# Supplementary material for: Comprehensive Pan-Cancer Analyses of Pyroptosis-Related Genes to Predict Survival and Immunotherapeutic Outcome
Source: MDPI journal article supplement (doi:10.3390/cancers14010237), 2022-01-04
Supplement: s1 [file s1]

Figure S1. Kaplan-Meier curves for the disease-free survival (DFS) of samples in the high-score group of Figure 2B.

Figure S2. Kaplan-Meier curves for the disease-free survival (DFS) of samples in the low-score group cancer of Figure 2C.

Figure S3. Kaplan-Meier curves for the disease-free survival (DFS) of samples in the middle-score group cancer of Figure 2D.

Figure S4. Regulation of PRGs by copy number variation (CNV) and enhancers.

Figure S5. Proportional hazard hypothesis test.

Figure S6. The LASSO Cox variable screening.

Figure S7. Kaplan-Meier curves for the DFS of patients in the high-risk and low-risk groups for each cancer type (ACC, BLCA, BRCA, CESC, COAD, ESCA, GBM, HNSC, KICH, and KIRC).

Figure S8. Kaplan-Meier curves for the DFS of patients in the high-risk and low-risk groups for each cancer type (LGG, LIHC, LUAD, LUSC, OV, PAAD, PCPG, and PRAD).

Figure S9. Kaplan-Meier curves for the DFS of patients in the high-risk and low-risk groups for each cancer type (READ, SARC, SKCM, STAD, TGCT, THCA, THYM, and UCEC).

Tables S1. Functional classification of genes involved in pyroptosis.

Tables S2. The abbreviations, classification and numbers of samples for the 31 cancer types investigated in this study.

Tables S3. The function description of KEGG pathway IDs.

Tables S4. Pearson correlations of genes that are positively correlated with risk scores.

Tables S5. Pearson correlations of genes that are negatively correlated with risk scores.

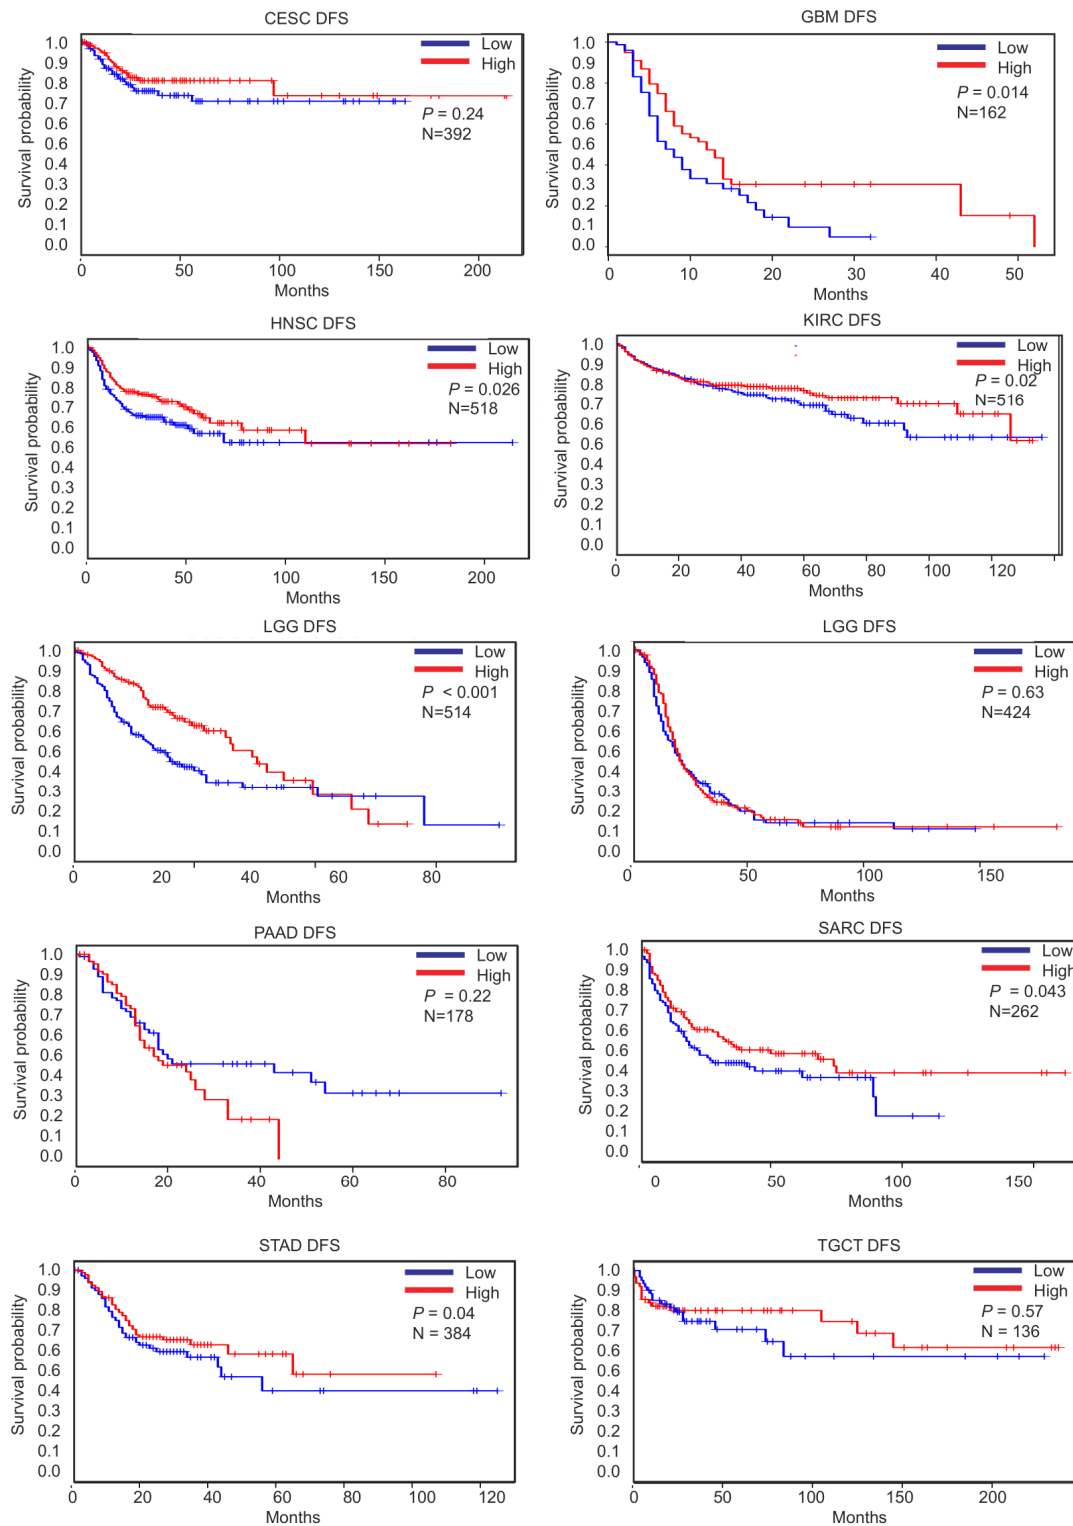

**Figure S1** Kaplan-Meier curves for the disease-free survival (DFS) of samples in the high-score group of Figure 2B.

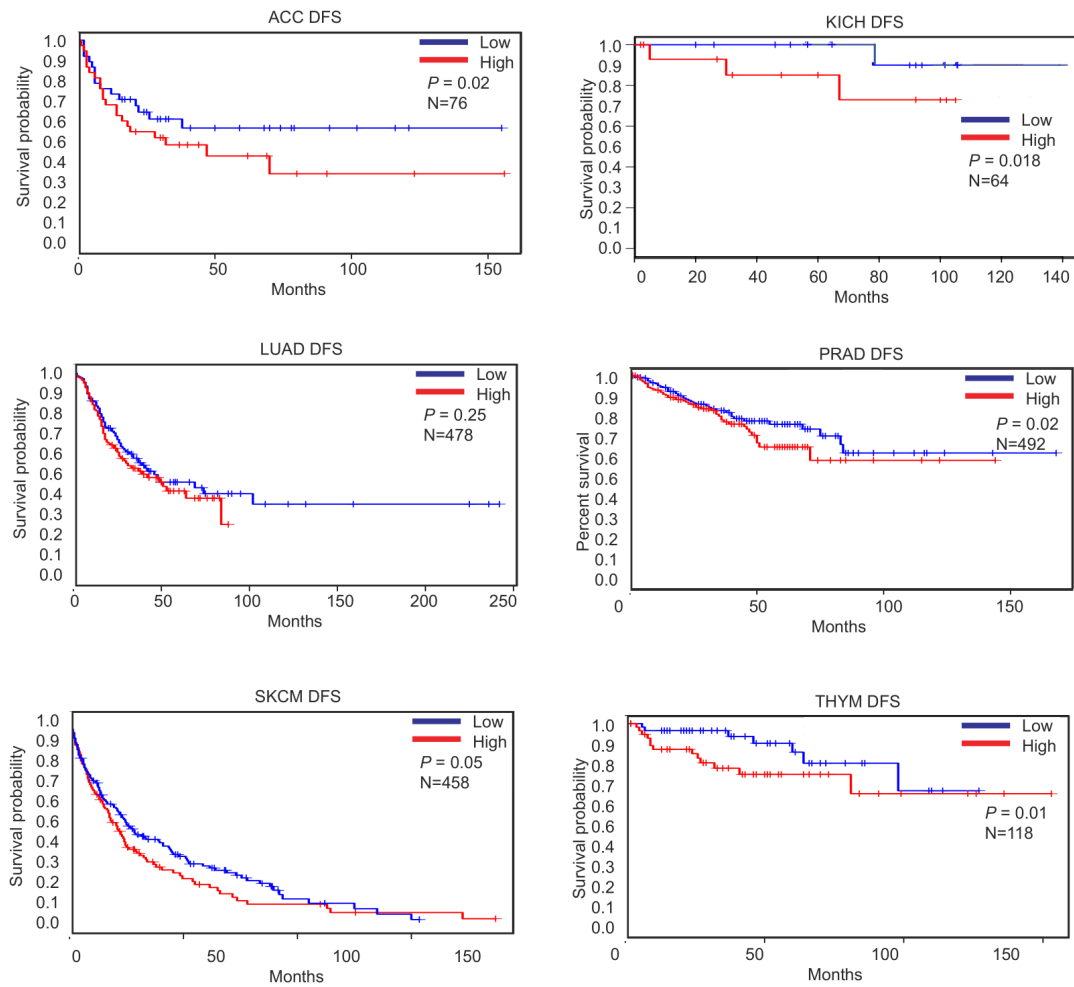

**Figure S2** Kaplan-Meier curves for the disease-free survival (DFS) of samples in the low-score group of Figure 2C.

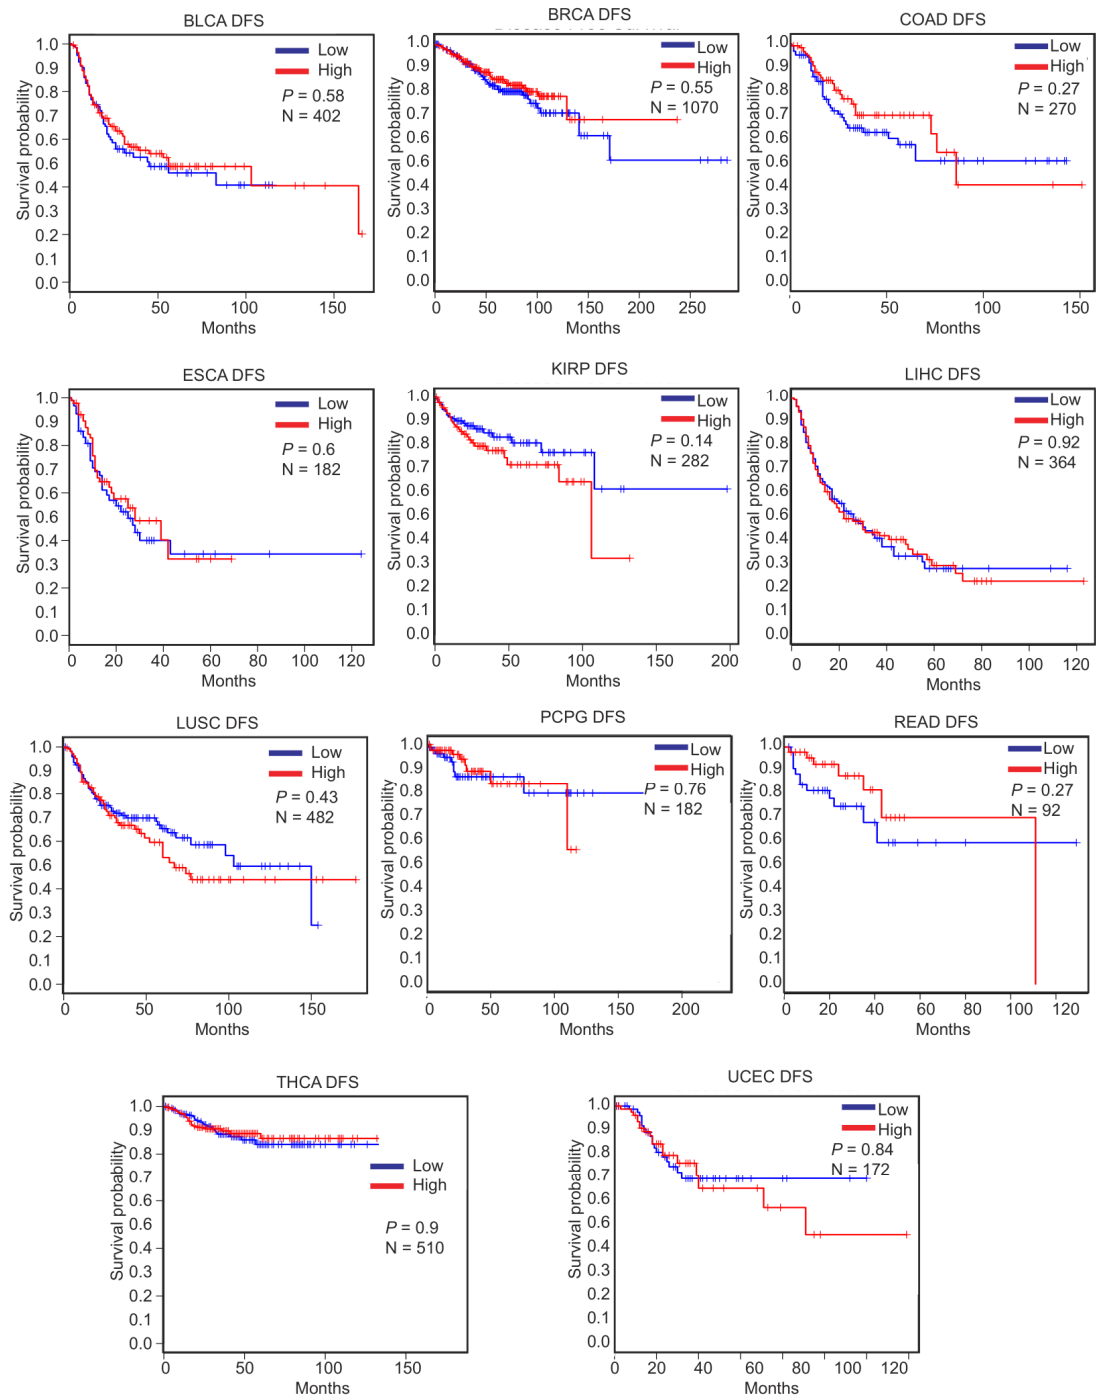

**Figure S3** Kaplan-Meier curves for the disease-free survival (DFS) of samples in the middle-score group of Figure 2D.

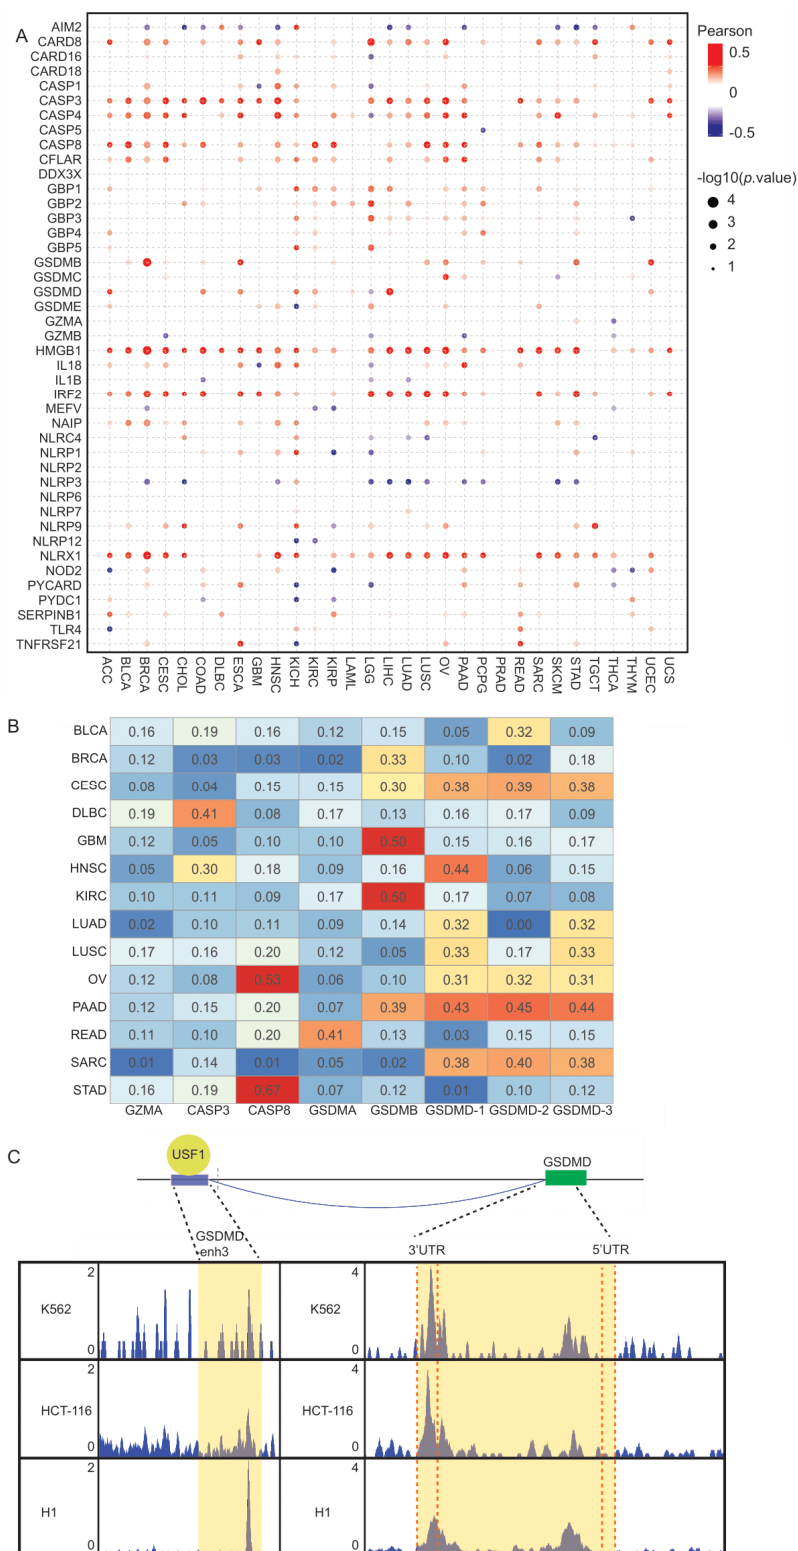

**Figure S4** Regulation of PRGs by copy number variation (CNV) and enhancers. (A) Pearson's correlation between CNV and the expression of PRGs. (B) The expression correlation between PRGs and potential enhancers. (C) ChIP-Seq signals of

transcription factor USF1 demonstrates that USF1 may bind to both GSDMD-enh3 and *GSDMD* simultaneously in cell lines K563, HCT-116 and H1, respectively.

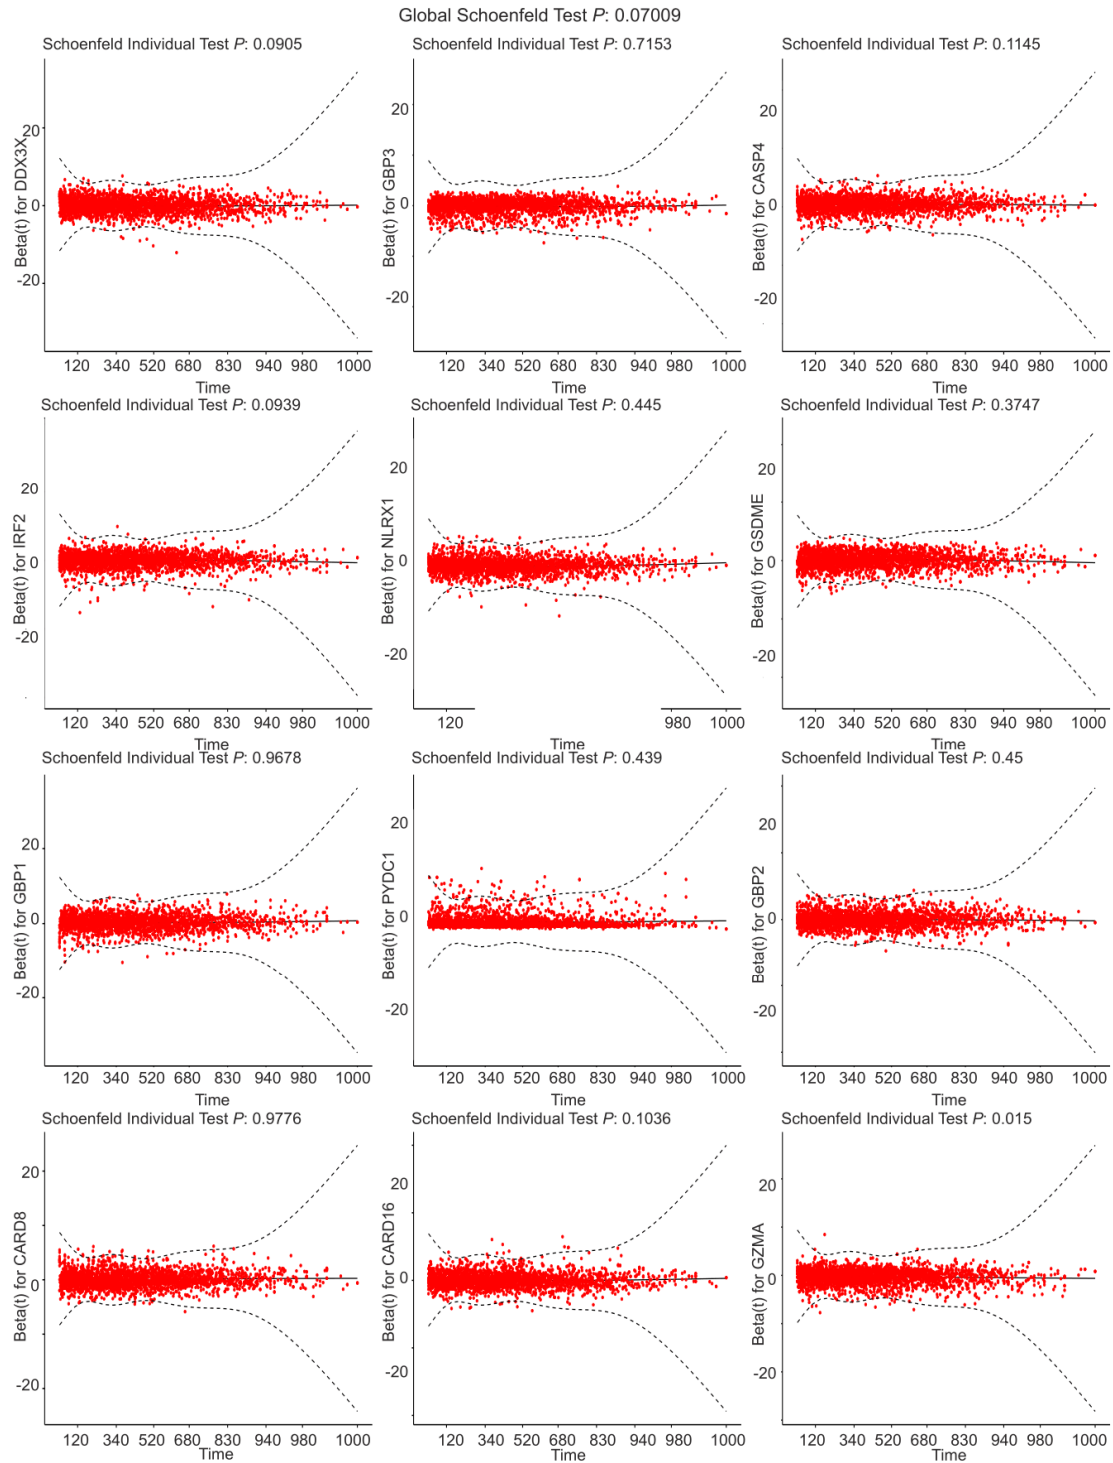

**Figure S5** Proportional hazard hypothesis test. Schoenfeld residual method judges the Proportional Hazards assumption of Cox proportional hazard regression analysis. The solid line is a smooth spline curve fitted to the curve, and the dashed line represents the +/- 2 standard error band around the fitting.



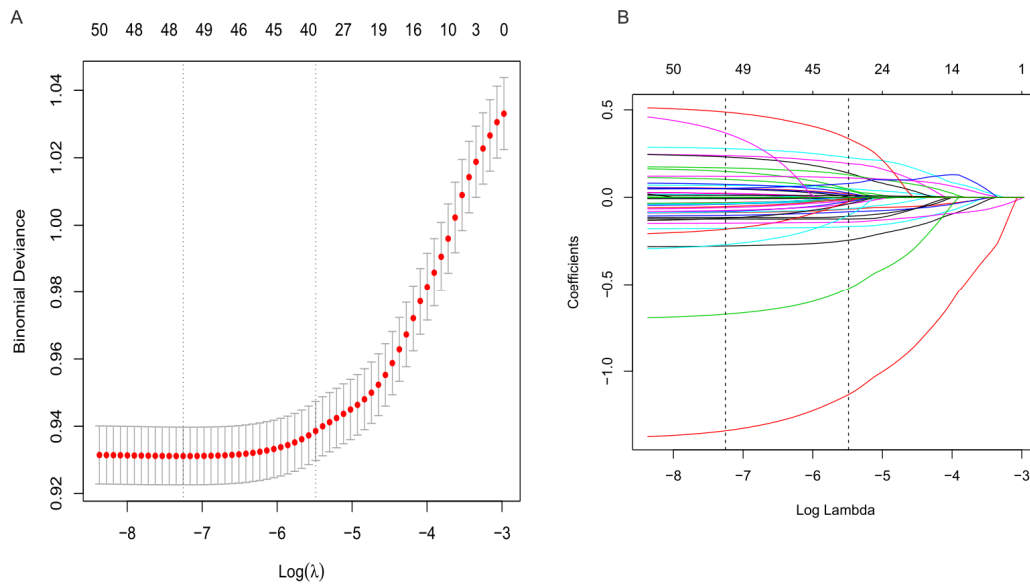

**Figure S6** The LASSO Cox variable screening. **(A)** The LASSO coefficient profiles of PRGs. LASSO, least absolute shrinkage and selection operator. **(B)** Ten-time cross-validation for tuning parameter selection in the LASSO model. Each curve represents the change trajectory of each gene, the ordinate is the coefficient value, and the upper abscissa is the number of non-zero coefficients in the model at this time.

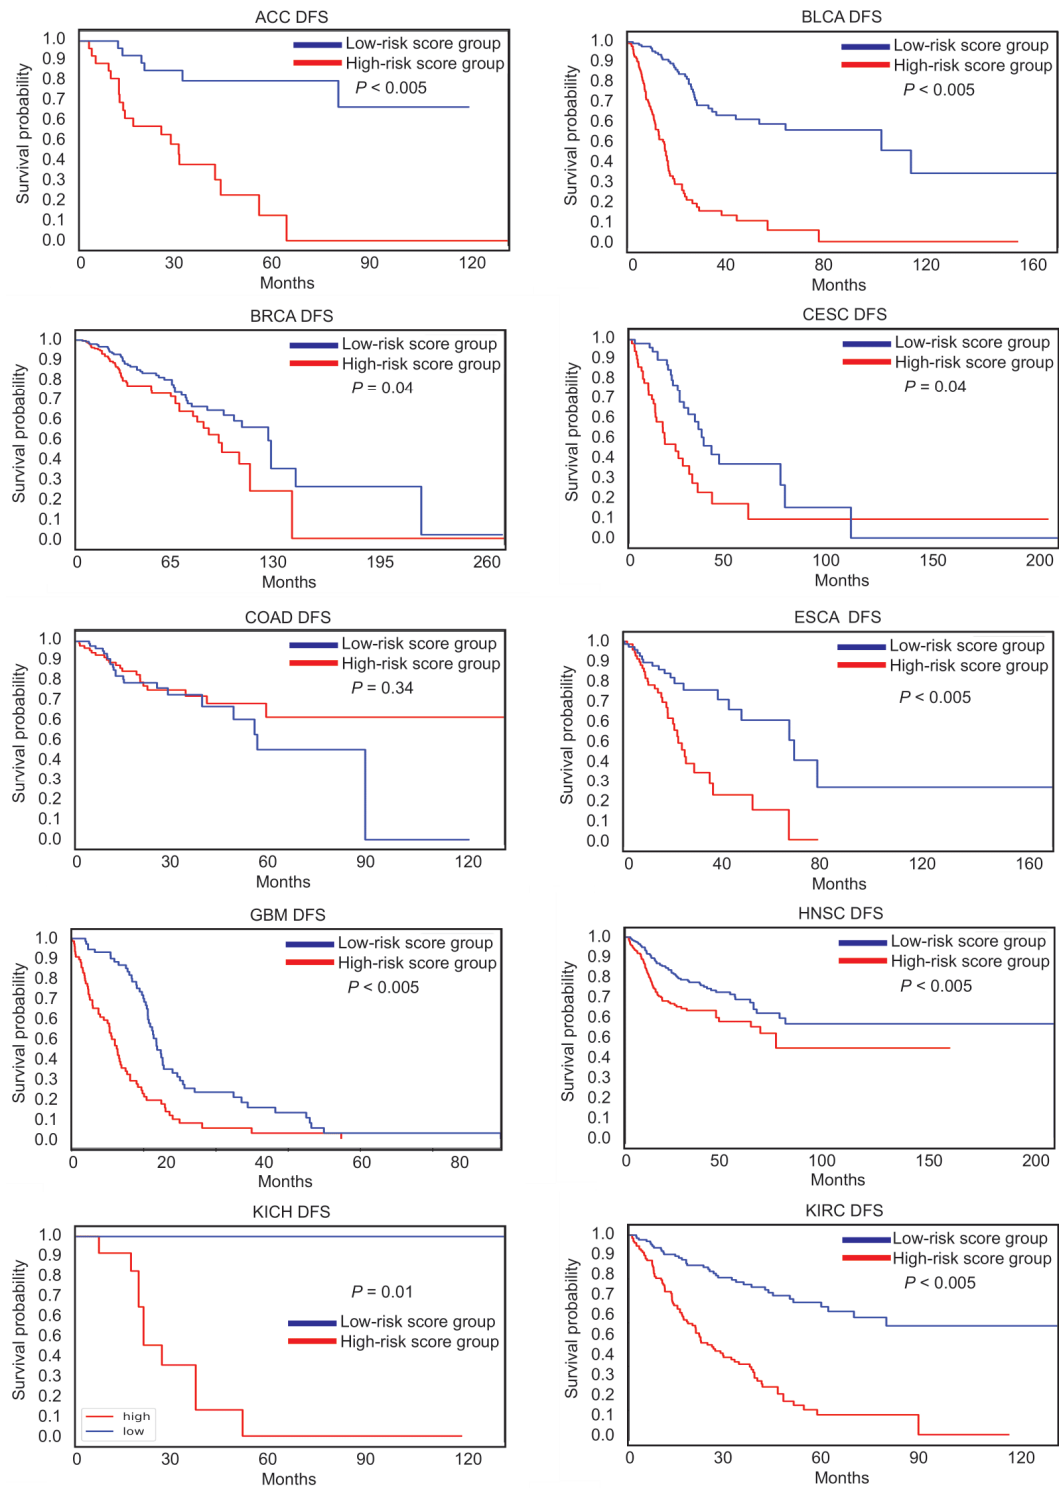

**Figure S7** Kaplan-Meier curves for the DFS of patients in the high-risk and low-risk groups for each cancer type (ACC, BLCA, BRCA, CESC, COAD, ESCA, GBM, HNSC, KICH, and KIRC).

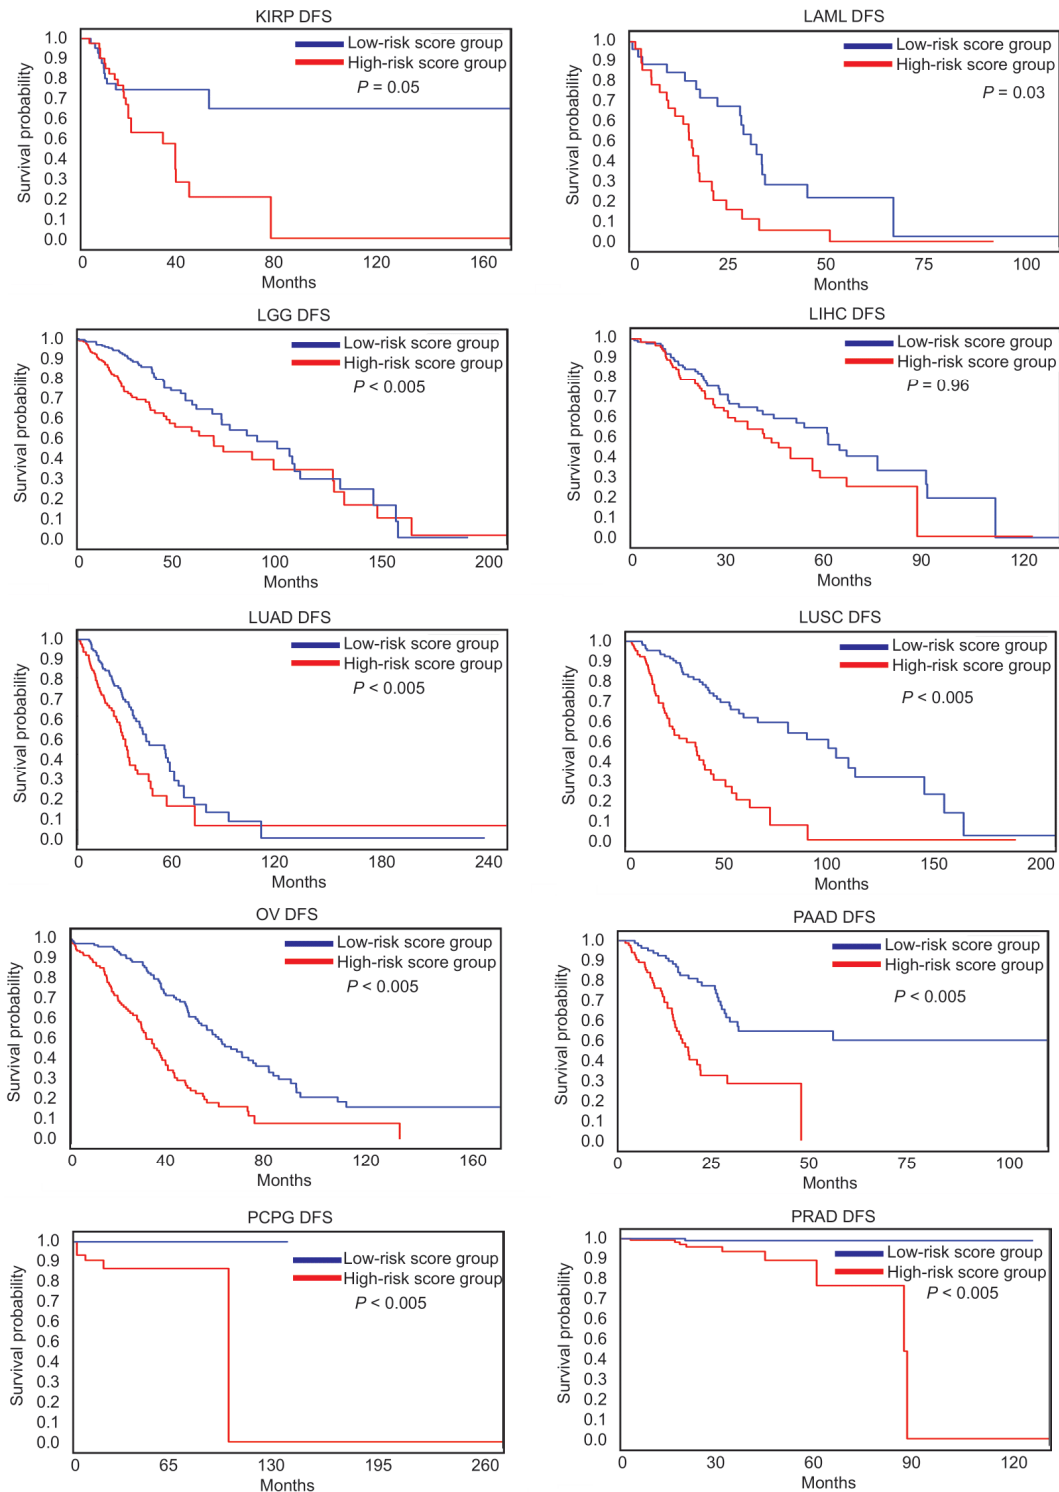

**Figure S8** Kaplan-Meier curves for the DFS of patients in the high-risk and low-risk groups for each cancer type (LGG, LIHC, LUAD, LUSC, OV, PAAD, PCPG, and PRAD).

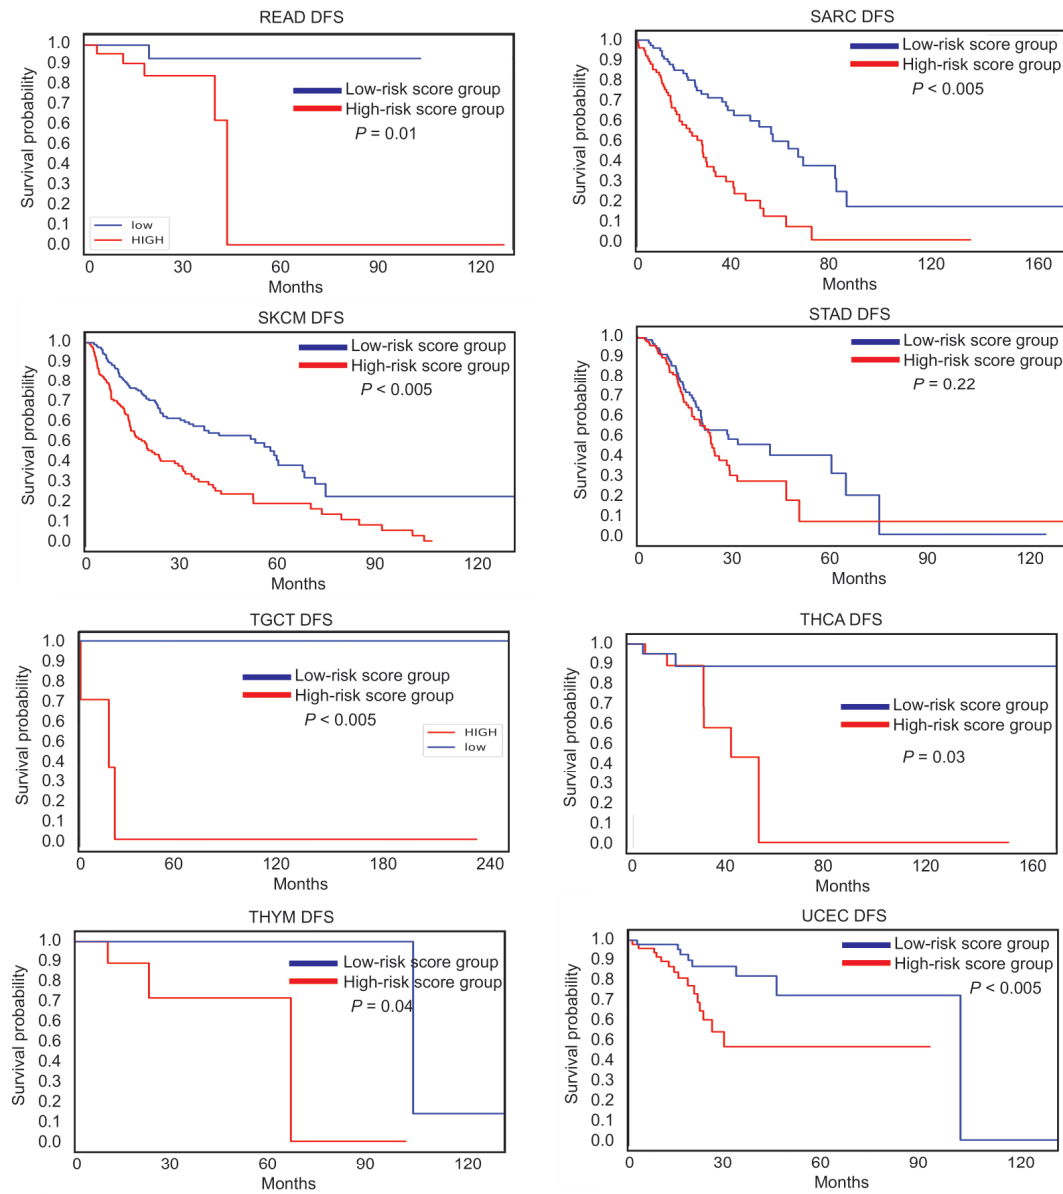

**Figure S9** Kaplan-Meier curves for the DFS of patients in the high-risk and low-risk groups for each cancer type (READ, SARC, SKCM, STAD, TGCT, THCA, THYM, and UCEC).

**Table S1.** Functional classification of genes involved in pyroptosis.

| Gene Function                                   | Gene Name                                                                                                    |
|-------------------------------------------------|--------------------------------------------------------------------------------------------------------------|
| Inflammasome sensor                             | <i>AIM2, NLRP1, NLRP2, NLRP3, NLRP6, NLRP7, NLRP9, NLRP12, NLRX1, NLRC4, NOD2, TLR4, MEFV (Pyrin)</i> (1, 2) |
| Inflammasome adaptor ASC                        | <i>PYDC1, PYCARD, CARD8, CARD16, CARD18</i> (3).                                                             |
| Cleavage protease                               | <i>caspase-1/3/4/5/8, GZMA, GZMB</i> (4) (5, 6).                                                             |
| Pyroptosis executor                             | <i>GSDMB, GSDMC, GSDMD, GSDME (DFNA5)</i> (7) (8-10) (11).                                                   |
| Inflammatory factor                             | <i>IL-1<math>\beta</math>, IL18, HMGB1</i> (12)                                                              |
| Activation of inflammasome                      | <i>GBP2*, GBP5, DDX3X, NAIP</i> (13, 14)                                                                     |
| The regulators of caspases and GSDMs activation | <i>SERPINB1, C-FLIP, TNFRSF21, GBP1, GBP2*, GBP3, GBP4, IRF2</i> (13, 14)                                    |

\* Dual function of *GBP2* in pyroptosis: promoting *AIM2* activation during infection with *Francisella novicida*; and controlling the recruitment of caspase-4 in IFN- $\gamma$  stimulated cells.

**Table S2.** The abbreviations, classification and numbers of samples for the 31 cancer types investigated in this study.

| Abbreviation | Cancer Type                                                      | Number of Cancer Samples | Number of Normal Samples |
|--------------|------------------------------------------------------------------|--------------------------|--------------------------|
| ACC          | Adrenocortical carcinoma                                         | 79                       | 17                       |
| BLCA         | Bladder Urothelial Carcinoma                                     | 407                      | 19                       |
| BRCA         | Breast invasive carcinoma                                        | 1097                     | 114                      |
| CESC         | Cervical squamous cell carcinoma and endocervical adenocarcinoma | 303                      | 3                        |
| CHOL         | Cholangiocarcinoma                                               | 36                       | 9                        |
| COAD         | Colon adenocarcinoma                                             | 286                      | 41                       |
| DLBC         | Lymphoid Neoplasm Diffuse Large B-cell Lymphoma                  | 48                       | 5                        |
| ESCA         | Esophageal carcinoma                                             | 184                      | 11                       |
| GBM          | Glioblastoma multiforme                                          | 154                      | 5                        |
| HNSC         | Head and Neck squamous cell carcinoma                            | 520                      | 44                       |
| KICH         | Kidney Chromophobe                                               | 66                       | 25                       |
| KIRC         | Kidney renal clear cell carcinoma                                | 533                      | 72                       |
| KIRP         | Kidney renal papillary cell carcinoma                            | 290                      | 32                       |
| LAML         | Acute Myeloid Leukemia                                           | 516                      | 110                      |
| LGG          | Brain Lower Grade Glioma                                         | 371                      | 23                       |
| LIHC         | Liver hepatocellular carcinoma                                   | 515                      | 50                       |
| LUAD         | Lung adenocarcinoma                                              | 1017                     | 59                       |

|      |                                      |     |    |
|------|--------------------------------------|-----|----|
| LUSC | Lung squamous cell carcinoma         | 502 | 51 |
| OV   | Ovarian serous cystadenocarcinoma    | 304 | 21 |
| PAAD | Pancreatic adenocarcinoma            | 178 | 4  |
| PCPG | Pheochromocytoma and Paraganglioma   | 179 | 3  |
| PRAD | Prostate adenocarcinoma              | 497 | 52 |
| READ | Rectum adenocarcinoma                | 94  | 10 |
| SARC | Sarcoma                              | 259 | 2  |
| SKCM | Skin Cutaneous Melanoma              | 104 | 1  |
| STAD | Stomach adenocarcinoma               | 415 | 35 |
| TGCT | Testicular Germ Cell Tumors          | 150 | 19 |
| THCA | Thyroid carcinoma                    | 505 | 59 |
| THYM | Thymoma                              | 120 | 2  |
| UCEC | Uterine Corpus Endometrial Carcinoma | 176 | 24 |
| UCS  | Uterine Carcinosarcoma               | 57  | 5  |

**Table S3.** The function description of KEGG pathway IDs.

| KEGG pathway ID | Function                                     |
|-----------------|----------------------------------------------|
| hsa04664        | Fc epsilon RI signaling pathway              |
| hsa04662        | B cell receptor signaling pathway            |
| hsa05202        | Transcriptional misregulation in cancer      |
| hsa04630        | Jak-STAT signaling pathway                   |
| hsa04064        | NF-kappa B signaling pathway                 |
| hsa04015        | Rap1 signaling pathway                       |
| hsa05340        | Primary immunodeficiency                     |
| hsa04672        | Intestinal immune network for IgA production |
| hsa04620        | Toll-like receptor signaling pathway         |
| hsa05321        | Inflammatory bowel disease (IBD)             |
| hsa04612        | Antigen processing and presentation          |
| hsa05323        | Rheumatoid arthritis                         |
| hsa05140        | Leishmaniasis                                |
| hsa04660        | T cell receptor signaling pathway            |
| hsa05322        | Systemic lupus erythematosus                 |
| hsa04650        | Natural killer cell mediated cytotoxicity    |
| hsa04062        | Chemokine signaling pathway                  |
| hsa05150        | Staphylococcus aureus infection              |
| hsa04060        | Cytokine-cytokine receptor interaction       |
| hsa04514        | Cell adhesion molecules (CAMs)               |
